# Supplementary material for: The evolutionary biomechanics of locomotor function in giant land animals
Source: Oxford University Press journal article supplement (doi:10.1242/jeb.217463), 2021-06-01
Supplement: jeb217463supp.pdf [file jeb217463supp.pdf]

**Table S1.** Dataset for taxa, geological time context, body masses (estimated/typical known) and references. See Fig. 1 for details.

[Click here to download Table S1](#)

**Table S2.** Dataset for maximal running speeds vs. body masses of extant mammals, modified from Dick and Clemente (2017), with notes/references for modifications. See Fig. 5 for details.

[Click here to download Table S2](#)

**Table S3.** Dataset for limb effective mechanical advantages (EMA) vs. body masses of extant mammals and other taxa, modified from Biewener (2005), with notes/references for modifications. See Fig. 3 for details.

[Click here to download Table S3](#)
